# Supplementary material for: Cigarette Smoking Abstinence Among Pregnant Individuals Using E-Cigarettes or Nicotine Replacement Therapy
Source: PubMed Central journal article supplement (PMC10498331; doi:10.1001/jamanetworkopen.2023.30249), 2023-09-12
Supplement: jamanetwopen-e2330249-s001.pdf [file jamanetwopen-e2330249-s001.pdf]

## Supplemental Online Content

Wen X, Chung MV, Liszewski KA, et al. Cigarette smoking abstinence among pregnant individuals using e-cigarettes or nicotine replacement therapy. *JAMA Netw Open*. 2023;6(9):e2330249. doi:10.1001/jamanetworkopen.2023.30249

**eTable.** Sociodemographic, Pregnancy, and Substance Use Characteristics of Study Participants Between the Excluded PRAMS Sample and the Analytic Subsample of 8 States With Data on Smoking Cessation Methods

This supplemental material has been provided by the authors to give readers additional information about their work.

**eTable. Sociodemographic, Pregnancy, and Substance Use Characteristics of Study Participants Between the Excluded PRAMS Sample and the Analytic Subsample of 8 States With Data on Smoking Cessation Methods**

| Characteristic                             | Excluded sample of states <i>without</i> data on smoking cessation methods (N=173,476) | Analytic sub-sample of 8 states <i>with</i> data on smoking cessation methods (N=32,604)* | P-value**        |
|--------------------------------------------|----------------------------------------------------------------------------------------|-------------------------------------------------------------------------------------------|------------------|
|                                            | %                                                                                      | %                                                                                         |                  |
| <b>Age, years</b>                          |                                                                                        |                                                                                           | <b>&lt;0.001</b> |
| ≤19                                        | 4.3                                                                                    | 4.6                                                                                       |                  |
| 20-24                                      | 18.1                                                                                   | 20.0                                                                                      |                  |
| 25-29                                      | 28.8                                                                                   | 29.8                                                                                      |                  |
| ≥30                                        | 48.9                                                                                   | 45.5                                                                                      |                  |
| <b>Race/ethnicity</b>                      |                                                                                        |                                                                                           | <b>&lt;0.001</b> |
| Non-Hispanic Caucasian                     | 56.8                                                                                   | 55.7                                                                                      |                  |
| Non-Hispanic African American              | 14.2                                                                                   | 19.5                                                                                      |                  |
| Hispanic or American Indian                | 20.0                                                                                   | 18.4                                                                                      |                  |
| Other race                                 | 9.0                                                                                    | 6.5                                                                                       |                  |
| <b>Education level</b>                     |                                                                                        |                                                                                           | <b>&lt;0.001</b> |
| High school or lower                       | 36.4                                                                                   | 39.1                                                                                      |                  |
| Associate's degree or some college         | 26.7                                                                                   | 26.8                                                                                      |                  |
| Bachelor's degree or higher                | 36.8                                                                                   | 34.2                                                                                      |                  |
| <b>Household annual income</b>             |                                                                                        |                                                                                           | <b>&lt;0.001</b> |
| ≤\$24000                                   | 32.7                                                                                   | 32.0                                                                                      |                  |
| \$24,001-\$48,000                          | 19.3                                                                                   | 22.0                                                                                      |                  |
| \$48,001-\$85,000                          | 18.9                                                                                   | 20.8                                                                                      |                  |
| ≥\$85,001                                  | 29.1                                                                                   | 25.2                                                                                      |                  |
| <b>Method of payment</b>                   |                                                                                        |                                                                                           | <b>&lt;0.001</b> |
| Medicaid                                   | 41.8                                                                                   | 39.5                                                                                      |                  |
| Private Insurance                          | 52.0                                                                                   | 51.7                                                                                      |                  |
| Self-pay                                   | 3.0                                                                                    | 4.7                                                                                       |                  |
| Other                                      | 3.2                                                                                    | 4.1                                                                                       |                  |
| <b>Number of prenatal care visits</b>      |                                                                                        |                                                                                           | 0.068            |
| ≤8                                         | 18.4                                                                                   | 17.8                                                                                      |                  |
| 9 to 11                                    | 31.1                                                                                   | 30.4                                                                                      |                  |
| ≥12                                        | 50.6                                                                                   | 51.8                                                                                      |                  |
| <b>Number of live births</b>               |                                                                                        |                                                                                           | <b>&lt;0.001</b> |
| 0                                          | 38.8                                                                                   | 38.9                                                                                      |                  |
| 1-2                                        | 49.7                                                                                   | 48.3                                                                                      |                  |
| ≥3                                         | 11.5                                                                                   | 12.8                                                                                      |                  |
| <b>Pre-pregnancy BMI, kg/m<sup>2</sup></b> |                                                                                        |                                                                                           | 0.055            |
| Underweight                                | 3.5                                                                                    | 3.4                                                                                       |                  |
| Normal weight                              | 45.0                                                                                   | 44.1                                                                                      |                  |
| Overweight                                 | 26.1                                                                                   | 25.6                                                                                      |                  |

| Characteristic                                       | Excluded sample of states <i>without data on smoking cessation methods</i> (N=173,476) | Analytic sub-sample of 8 states <i>with data on smoking cessation methods</i> (N=32,604)* | P-value**        |
|------------------------------------------------------|----------------------------------------------------------------------------------------|-------------------------------------------------------------------------------------------|------------------|
|                                                      | %                                                                                      | %                                                                                         |                  |
| Obese                                                | 25.4                                                                                   | 26.8                                                                                      |                  |
| <b>Gestational hypertension</b>                      |                                                                                        |                                                                                           | <b>0.003</b>     |
| Yes                                                  | 9.8                                                                                    | 8.9                                                                                       |                  |
| No                                                   | 90.2                                                                                   | 91.1                                                                                      |                  |
| <b>Gestational diabetes</b>                          |                                                                                        |                                                                                           | <b>0.033</b>     |
| Yes                                                  | 7.1                                                                                    | 6.5                                                                                       |                  |
| No                                                   | 92.9                                                                                   | 93.5                                                                                      |                  |
| <b>Infant sex</b>                                    |                                                                                        |                                                                                           | <b>0.032</b>     |
| Male                                                 | 50.8                                                                                   | 52.0                                                                                      |                  |
| Female                                               | 49.2                                                                                   | 48.0                                                                                      |                  |
| <b>Number of cigarettes smoke</b>                    |                                                                                        |                                                                                           | <b>&lt;0.001</b> |
| ≥41                                                  | 0.3                                                                                    | 0.2                                                                                       |                  |
| 21 to 40                                             | 0.9                                                                                    | 0.9                                                                                       |                  |
| 11 to 20                                             | 4.0                                                                                    | 3.6                                                                                       |                  |
| 6 to 10                                              | 4.4                                                                                    | 4.0                                                                                       |                  |
| 1 to 5                                               | 5.1                                                                                    | 4.3                                                                                       |                  |
| <1                                                   | 1.7                                                                                    | 1.3                                                                                       |                  |
| 0                                                    | 83.5                                                                                   | 85.8                                                                                      |                  |
| <b>Depression</b>                                    |                                                                                        |                                                                                           | 0.784            |
| Yes                                                  | 85.8                                                                                   | 85.9                                                                                      |                  |
| No                                                   | 14.2                                                                                   | 14.1                                                                                      |                  |
| <b>Hookah Use</b>                                    |                                                                                        |                                                                                           | 0.164            |
| Yes                                                  | 95.4                                                                                   | 95.1                                                                                      |                  |
| No                                                   | 4.6                                                                                    | 4.9                                                                                       |                  |
| <b>Type of health insurance</b>                      |                                                                                        |                                                                                           | <b>&lt;0.001</b> |
| Medicaid                                             | 41.8                                                                                   | 39.5                                                                                      |                  |
| Private insurance/self-pay/other                     | 58.2                                                                                   | 60.5                                                                                      |                  |
| <b>Frequency of e-cigarette use before pregnancy</b> |                                                                                        |                                                                                           | 0.304            |
| More than once a day                                 | 1.7                                                                                    | 1.8                                                                                       |                  |
| Once a day or 2-6 days a week                        | 1.0                                                                                    | 1.1                                                                                       |                  |
| 1 day a week or less                                 | 1.7                                                                                    | 1.6                                                                                       |                  |
| Not using electronic vapor products                  | 95.6                                                                                   | 95.4                                                                                      |                  |

PRAMS, Pregnancy Risk Assessment Monitoring System; BMI, body mass index.

\* The 8 participating states included Arkansas, Florida, Georgia, Iowa, Utah, Virginia, Vermont, and West Virginia.

\*\* P-values from Wald Chi-square tests.
